# Supplementary material for: 3d-Metal derivatives of the [CuI(SO3)4]7− ion: structure and magnetism
Source: Royal Society of Chemistry journal article supplement (doi:10.1039/c2dt12337a), 2012-01-01
Supplement: c2dt12337a.pdf [file c2dt12337a.pdf]

### **3d-Metal derivatives of the $[\text{Cu}^{\text{I}}(\text{SO}_3)_4]^{7-}$ ion; Structure and Magnetism**

Brendan F. Abrahams\*<sup>a</sup>, Carmel T. Abrahams<sup>a,b</sup>, Marissa G. Haywood<sup>a</sup>, Timothy A.

Hudson<sup>a</sup>, Boujemaa Moubaraki<sup>c</sup>, Keith S. Murray<sup>c</sup> and Richard Robson\*<sup>a</sup>

### **Electronic Supplementary Information**

Table S1. Hydrogen Bond Distances and Angles for Na<sub>5</sub>[(Cu<sup>II</sup>(H<sub>2</sub>O)Cu<sup>I</sup>(SO<sub>3</sub>)<sub>4</sub>)]·6H<sub>2</sub>O

| D-H···A                    | D-H (Å) | H···A (Å) | D···A (Å) | D-H···A (°) |
|----------------------------|---------|-----------|-----------|-------------|
| O(13) --H(1) ..O(8)(I)     | 0.83(5) | 2.08(5)   | 2.901(5)  | 173(5)      |
| O(13) --H(2) ..O(7)(II)    | 0.82(4) | 1.98(3)   | 2.777(5)  | 166(5)      |
| O(14) --H(3) ..O(11)(I)    | 0.83(5) | 1.90(4)   | 2.727(5)  | 175(5)      |
| O(14) --H(4) ..O(17)(V)    | 0.81(3) | 2.59(5)   | 2.911(6)  | 105(5)      |
| O(14) --H(4) ..O(8)(III)   | 0.81(3) | 2.11(3)   | 2.916(5)  | 168(5)      |
| O(15) --H(5) ..O(18)(IV)   | 0.83(5) | 1.98(5)   | 2.808(6)  | 174(4)      |
| O(15) --H(6) ..O(7)(IV)    | 0.82(4) | 1.91(4)   | 2.716(6)  | 167(5)      |
| O(16) --H(7) ..O(7)        | 0.81(4) | 2.00(4)   | 2.793(5)  | 165(5)      |
| O(16) --H(8) ..O(18)(IV)   | 0.83(3) | 2.23(4)   | 3.020(5)  | 160(5)      |
| O(17) --H(9) ..O(19)       | 0.82(5) | 1.94(5)   | 2.737(6)  | 167(5)      |
| O(17) --H(10) ..O(8) (IV)  | 0.82(4) | 2.20(3)   | 2.958(6)  | 153(5)      |
| O(18) --H(11) ..O(17) (V)  | 0.82(2) | 1.95(3)   | 2.765(6)  | 175(8)      |
| O(18) --H(12) ..O(10) (VI) | 0.82(3) | 1.94(3)   | 2.743(6)  | 167(5)      |
| O(19) --H(13) ..O(8) (I)   | 0.82(3) | 2.08(4)   | 2.829(5)  | 151(4)      |
| O(19) --H(14) ..O(15)(IV)  | 0.83(5) | 1.97(6)   | 2.769(6)  | 161(6)      |

I x, 1/2-y, 1/2+z; II x, 1+y, z; III x, -1/2-y, 1/2+z; IV -x, 1/2+y, 1/2-z; V -x, -y, 1-z;  
 VI -x, -1/2+y, 1/2-z

Table S2. Hydrogen Bond Distances and Angles for

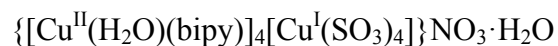

| D-H···A                  | D-H (Å) | H···A (Å) | D···A (Å) | D-H···A (°) |
|--------------------------|---------|-----------|-----------|-------------|
| O(1) --H(10) ..O(3) (I)  | 0.87(3) | 1.86(3)   | 2.708(6)  | 166(4)      |
| O(1) --H(20) ..O(3) (II) | 0.88(5) | 1.85(5)   | 2.728(5)  | 177(10)     |

I 1-x, 3/2-y, z; II 5/4-y, 1/4+x, -3/4-z

Table S3. Hydrogen Bond Distances and Angles for  $\text{Na}_{12}\{[\text{Cu}^{\text{I}}(\text{SO}_3)_4]_2(\text{Mn}^{\text{II}})\} \cdot 8\text{H}_2\text{O}$ .

| D-H...A                     | D-H (Å) | H...A (Å) | D...A (Å) | D-H...A (°) |
|-----------------------------|---------|-----------|-----------|-------------|
| O(14) --H(141) ..O(5)       | 0.89(6) | 2.35(7)   | 2.995(6)  | 129(6)      |
| O(14) --H(141) ..O(1) (I)   | 0.89(6) | 2.59(7)   | 3.134(6)  | 121(6)      |
| O(14) --H(142) ..O(22)(II)  | 0.89(5) | 1.80(5)   | 2.676(6)  | 168(6)      |
| O(19) --H(191) ..O(18)      | 0.89(5) | 2.02(6)   | 2.842(6)  | 153(7)      |
| O(19) --H(192) ..O(23)(III) | 0.89(4) | 2.20(6)   | 2.972(6)  | 145(7)      |
| O(19) --H(192) ..O(6)(IV)   | 0.89(4) | 2.32(7)   | 2.892(6)  | 122(6)      |
| O(20) --H(201) ..O(5)(V)    | 0.89(4) | 1.97(4)   | 2.808(6)  | 155(5)      |
| O(20) --H(202) ..O(19)      | 0.90(2) | 2.49(6)   | 2.998(6)  | 117(5)      |
| O(20) --H(202) ..O(1)(VI)   | 0.90(2) | 2.15(3)   | 2.980(6)  | 153(6)      |
| O(23) --H(231) ..O(3)(V)    | 0.82(6) | 2.12(6)   | 2.906(6)  | 161(5)      |
| O(23) --H(232) ..O(1)       | 0.83(6) | 2.00(6)   | 2.816(6)  | 168(6)      |

I -x, 1-y, 2-z; II 1-x, 1-y, 2-z; III -1/2-x, -1/2+y, 3/2-z; IV -1/2+x, 3/2-y, -1/2+z; V 1/2-x, 1/2+y, 3/2-z; VI 1/2+x, 3/2-y, -1/2+z

Table S4. Hydrogen Bond Distances and Angles for

$\text{Na}_3(\text{H}_2\text{O})_6[\text{Fe}^{\text{II}}(\text{H}_2\text{O})_6]_2\{[\text{Cu}^{\text{I}}(\text{SO}_3)_4]_2[\text{Fe}^{\text{III}}(\text{H}_2\text{O})]_3(\text{O})\} \cdot \text{H}_2\text{O}$

| D-H...A                    | D-H (Å) | H...A (Å) | D...A (Å) | D-H...A (°) |
|----------------------------|---------|-----------|-----------|-------------|
| O(4) --H(41) ..O(7) (I)    | 0.86(7) | 1.96(8)   | 2.807(7)  | 173(12)     |
| O(4) --H(42) ..O(3) (II)   | 0.86(7) | 1.98(7)   | 2.792(9)  | 158(8)      |
| O(7) --H(71) ..O(3) (III)  | 0.85(5) | 1.85(5)   | 2.683(8)  | 167(6)      |
| O(7) --H(72) ..O(3)        | 0.86(2) | 1.87(3)   | 2.729(6)  | 177(12)     |
| O(10) --H(101) ..O(6) (IV) | 0.86(6) | 2.18(12)  | 2.852(10) | 135(9)      |
| O(12) --H(121) ..O(1) (V)  | 0.86(7) | 1.90(7)   | 2.729(9)  | 163(8)      |
| O(12) --H(122) ..O(2) (I)  | 0.86(7) | 2.57(9)   | 3.213(7)  | 132(8)      |
| O(12) --H(122) ..O(6) (VI) | 0.86(7) | 2.11(10)  | 2.879(8)  | 150(10)     |

I 1-x,1-y,-z; II 1-y,x-y,z; III 2-x,1-y,-z; IV =-y,x-y,z; V 1+y,1-x+y,-z; VI x-y,x,-z

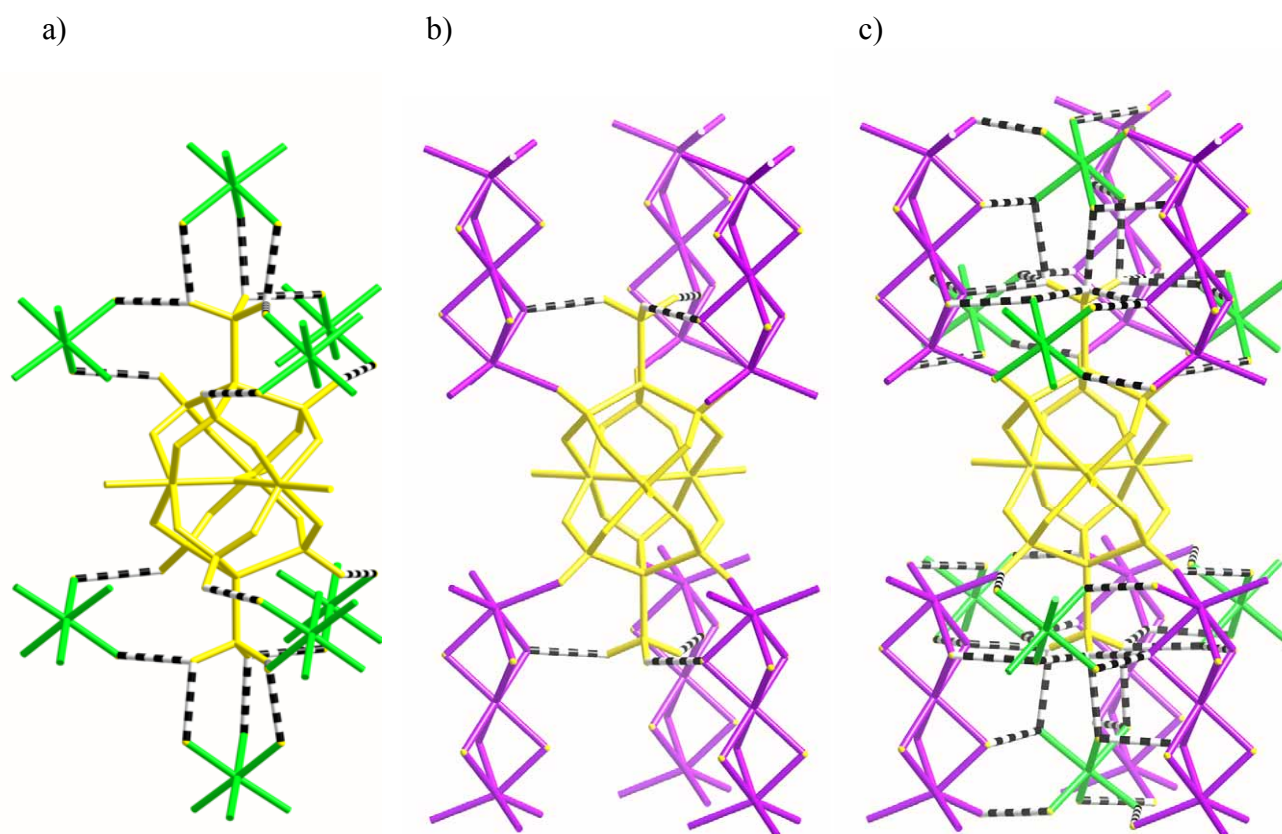

**Figure S1.** Stick representations of the cations surrounding the

$\{[\text{Cu}^{\text{I}}(\text{SO}_3)_4]_2[\text{Fe}^{\text{III}}(\text{H}_2\text{O})_3(\text{O})]_3\}^{7-}$  complex anion in

$\text{Na}_3(\text{H}_2\text{O})_6[\text{Fe}^{\text{II}}(\text{H}_2\text{O})_6]_2\{[\text{Cu}^{\text{I}}(\text{SO}_3)_4]_2[\text{Fe}^{\text{III}}(\text{H}_2\text{O})_3(\text{O})]_3\} \cdot \text{H}_2\text{O}$ . The complex anion is

represented by yellow connections; the links from  $\text{Na}^+$  ions to water molecules and sulfite

oxygen atoms are indicated by pink connections; the green connections represent the

octahedral  $\text{Fe}(\text{H}_2\text{O})_6^{2+}$  ions. Striped connections represent hydrogen bonds.

a) the complex anion and the  $\text{Fe}(\text{H}_2\text{O})_6^{2+}$  cations b) the complex anion and the  $\text{Na}_3(\text{H}_2\text{O})_6^{3+}$

cations (including connections to the sulfite oxygen atoms from  $\text{Na}^+$  ions) c) the complex

anion with both types of cation.

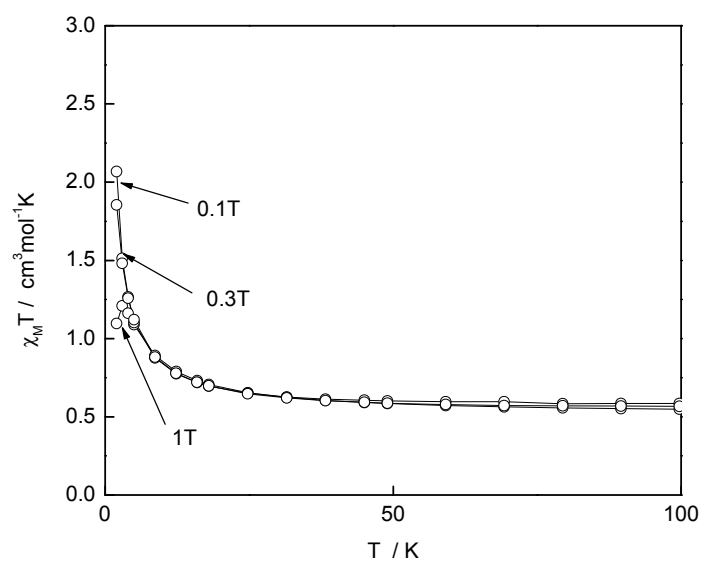

**Figure S2** Plots of  $\chi_M T$  vs temperature (2 – 100 K) for  $\text{Na}_5[(\text{Cu}^{\text{II}}(\text{H}_2\text{O})\text{Cu}^{\text{I}}(\text{SO}_3)_4] \cdot 6\text{H}_2\text{O}$  in DC fields of 1 T, 0.3 T and 0.1 T. The solid lines just join the points.
